# Supplementary material
Source: bioRxiv or medRxiv preprint supplement (http://medrxiv.stage.highwire.org/highwire/filestream/92135/field_highwire_adjunct_files/0/2020.08.04.20168039-1.pdf)
Supplement: Supplementary file [file 2020.08.04.20168039-1.pdf]

**Supplementary Table 1. Principal Component Analysis: Rotated Component Matrix**

|                                                             | Component               |                         |                         |                         |
|-------------------------------------------------------------|-------------------------|-------------------------|-------------------------|-------------------------|
|                                                             | 1                       | 2                       | 3                       | 4                       |
| I've been feeling down                                      | <b>.713<sup>a</sup></b> | -.086                   | -.020                   | .022                    |
| I've had trouble relaxing                                   | <b>.666<sup>a</sup></b> | .090                    | .172                    | .029                    |
| I've been feeling lonely                                    | <b>.618<sup>a</sup></b> | .051                    | .162                    | .088                    |
| I've been feeling worried                                   | <b>.531<sup>a</sup></b> | .043                    | -.226                   | -.147                   |
| I've become easily annoyed or irritable                     | <b>.482<sup>a</sup></b> | .113                    | -.010                   | -.072                   |
| I've had time to exercise                                   | -.025                   | <b>.697<sup>b</sup></b> | .069                    | .176                    |
| I've had time to focus on my health                         | .097                    | <b>.670<sup>b</sup></b> | -.046                   | -.051                   |
| I've had time to enjoy personal interests or hobbies        | .072                    | <b>.579<sup>b</sup></b> | .089                    | -.221                   |
| I've been having poor appetite                              | -.039                   | .031                    | <b>.733<sup>c</sup></b> | -.080                   |
| I've had trouble falling or staying asleep                  | .339                    | .017                    | <b>.483<sup>c</sup></b> | .122                    |
| I feel connected with my local community                    | .098                    | .362                    | -.404                   | -.151                   |
| I've been overeating                                        | .071                    | .250                    | .327                    | -.116                   |
| I've had the opportunity to chat with my family and friends | .046                    | -.255                   | -.051                   | <b>.609<sup>d</sup></b> |
| I've enjoyed the spring weather                             | -.055                   | .020                    | .327                    | <b>.501<sup>d</sup></b> |
| I've been feeling tired or having little energy             | .326                    | .081                    | .137                    | -.489                   |
| I feel able to cope with the situation                      | .310                    | .208                    | -.038                   | <b>.442<sup>d</sup></b> |

Rotation Method: Varimax with Kaiser Normalization.

<sup>a</sup>. Component 1: Maternal mental health

<sup>b</sup>. Component 2: Time availability for own health, hobbies and interests

<sup>c</sup>. Component 3: Appetite and sleep changes

<sup>d</sup>. Component 4: Coping
